# Supplementary material for: Beryllium carbonyl Be(CO)n (n = 1–4) complex: a p-orbital analogy of Dewar–Chatt–Duncanson model
Source: Royal Society of Chemistry journal article supplement (doi:10.1039/d4cp00908h), 2024-01-01
Supplement: d4cp00908h2.pdf [file d4cp00908h2.pdf]

**Supporting Information**  
**Of**  
**Beryllium Carbonyl  $\text{Be}(\text{CO})_n$  ( $n = 1-4$ ) Complex: A p-Orbital Analogy of**  
**Dewar-Chatt-Duncanson Model‡**

Siddhartha K. Purkayastha,<sup>a</sup> Shahnaz S. Rohman,<sup>b</sup> Pattiyil Parameswaran\*<sup>b</sup> and Ankur K.  
Guha\*<sup>a</sup>

<sup>a</sup>*Advanced Computational Chemistry Centre, Cotton University, Panbazar, Guwahati,  
Assam, INDIA-781001*

*\*Email: ankurkantiguha@gmail.com.*

<sup>b</sup>*Department of Chemistry, National Institute of Technology Calicut, Kozhikode, 673601,  
India*

*\*E-mail: param@nitc.ac.in*

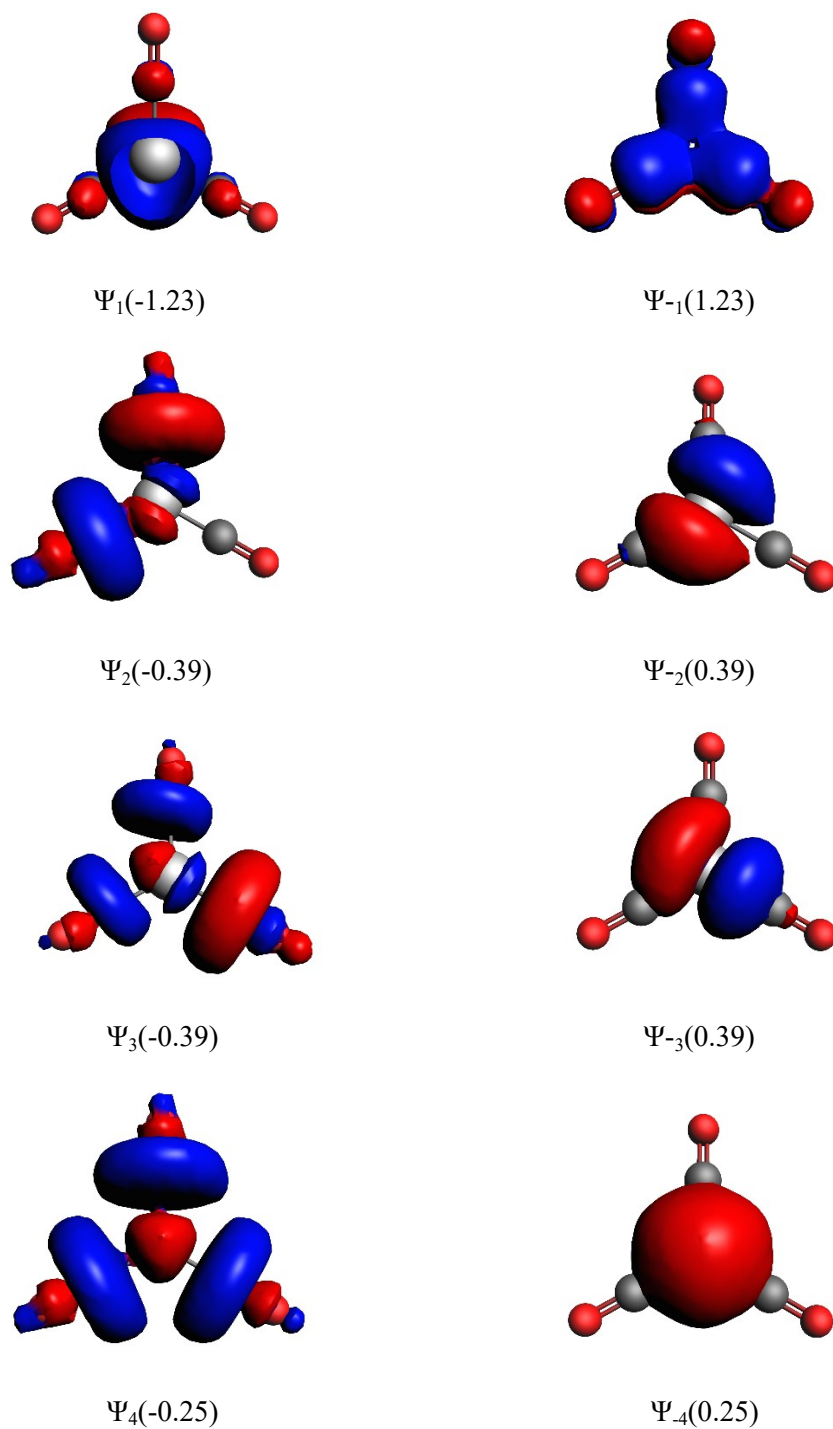

**Fig. S1.** Plots of important NOCV pair of orbitals  $\Psi_{-n}/\Psi_n$  in  $\text{Be}(\text{CO})_3$  with their eigenvalues in parenthesis.

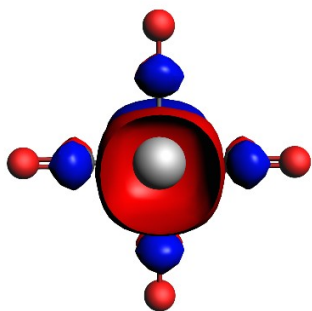

$\Psi_1(-1.24)$

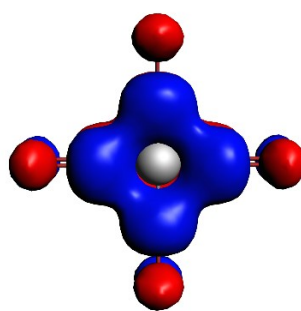

$\Psi_{-1}(1.24)$

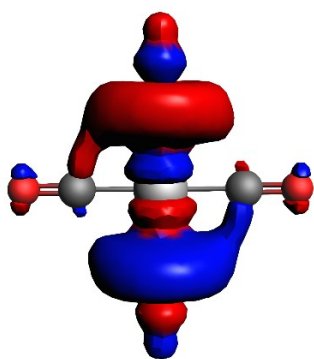

$\Psi_2(-0.36)$

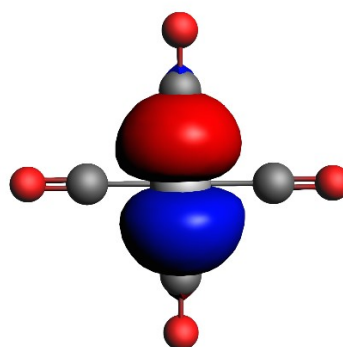

$\Psi_{-2}(0.36)$

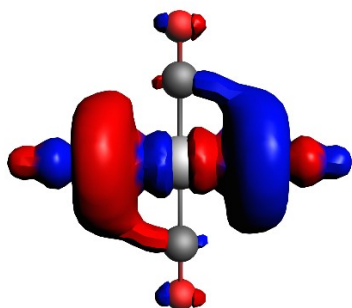

$\Psi_3(-0.36)$

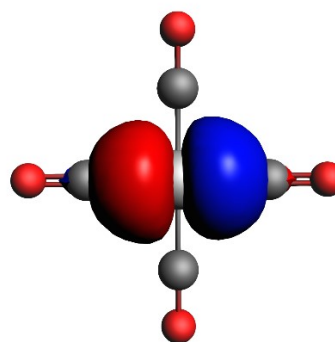

$\Psi_{-3}(0.36)$

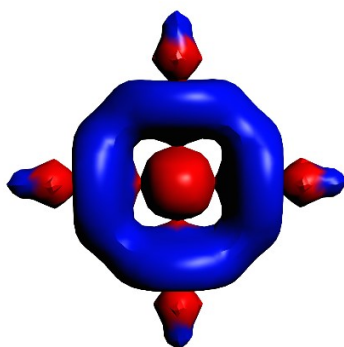

$\Psi_4(-0.28)$

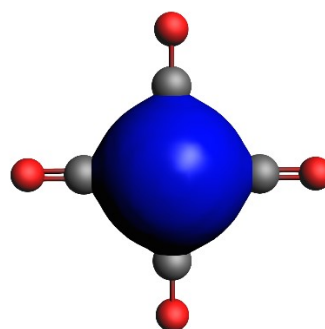

$\Psi_{-4}(0.28)$

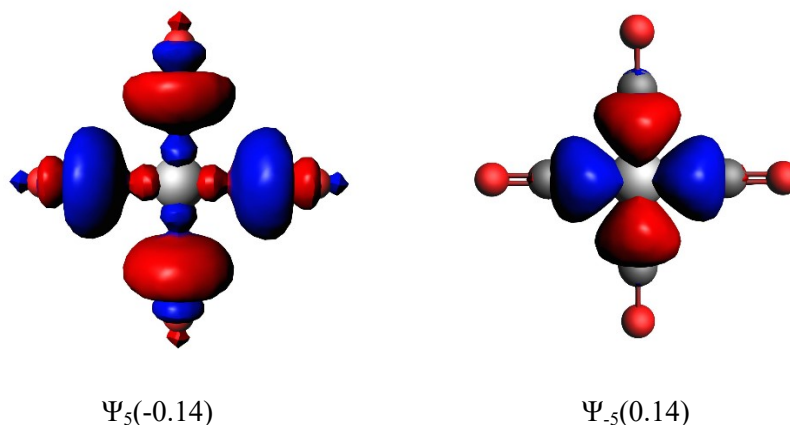

**Fig. S2.** Plots of important NOCV pair of orbitals  $\Psi_{-n}/\Psi_n$  in  $\text{Be}(\text{CO})_4$  with their eigenvalues in parenthesis.

Cartesian coordinates of the TPSSh/def2-TZVP optimized geometries of the molecules.

$\text{BeCO}$  (triplet)

|   |             |             |              |
|---|-------------|-------------|--------------|
| 4 | 0.000000000 | 0.000000000 | 1.816393000  |
| 6 | 0.000000000 | 0.000000000 | 0.142988000  |
| 8 | 0.000000000 | 0.000000000 | -1.015437000 |

$\text{Be}(\text{CO})_2$  (triplet)

|   |              |              |              |
|---|--------------|--------------|--------------|
| 4 | 0.000000000  | 0.000586000  | 0.000050000  |
| 6 | -1.608751000 | -0.000070000 | 0.000031000  |
| 8 | -2.763409000 | -0.000155000 | -0.000023000 |
| 6 | 1.608751000  | 0.000316000  | -0.000052000 |
| 8 | 2.763409000  | -0.000323000 | 0.000013000  |

$\text{Be}(\text{CO})_3$  (singlet)

|   |              |              |              |
|---|--------------|--------------|--------------|
| 4 | -0.001095000 | 0.000055000  | -0.000134000 |
| 6 | -1.655956000 | 0.033774000  | -0.000047000 |
| 8 | -2.801053000 | 0.057078000  | 0.000059000  |
| 6 | 0.856719000  | 1.415724000  | -0.000062000 |
| 8 | 1.450688000  | 2.395025000  | 0.000065000  |
| 6 | 0.798225000  | -1.449443000 | -0.000041000 |
| 8 | 1.351671000  | -2.452171000 | 0.000056000  |

$\text{Be}(\text{CO})_3$  (triplet)

|   |              |              |              |
|---|--------------|--------------|--------------|
| 4 | -0.138554000 | -0.000329000 | 0.000086000  |
| 6 | -1.846243000 | -0.001039000 | 0.000008000  |
| 8 | -2.985066131 | 0.069683835  | -0.000017422 |
| 6 | 0.748573000  | -1.445909000 | 0.000077000  |
| 8 | 1.450334971  | -2.367970008 | -0.000065513 |
| 6 | 0.746806000  | 1.446159000  | 0.000074000  |
| 8 | 1.445143937  | 2.370822599  | -0.000075254 |

Be(CO)<sub>4</sub> (singlet)

|   |              |              |              |
|---|--------------|--------------|--------------|
| 4 | -0.000082000 | 0.000406000  | -0.000026000 |
| 6 | 1.782436000  | 0.322000000  | 0.000412000  |
| 8 | 2.906882000  | 0.524944000  | 0.000920000  |
| 6 | 0.321941000  | -1.782018000 | -0.000433000 |
| 8 | 0.525444000  | -2.906368000 | -0.000898000 |
| 6 | -0.322015000 | 1.782411000  | -0.000432000 |
| 6 | -1.782450000 | -0.321965000 | 0.000411000  |
| 8 | -2.906723000 | -0.525871000 | 0.000919000  |
| 8 | -0.525497000 | 2.906772000  | -0.000896000 |

Be(CO)<sub>4</sub> (triplet)

|   |              |              |              |
|---|--------------|--------------|--------------|
| 4 | -0.000423000 | 0.000210000  | -0.000022000 |
| 6 | -1.706290000 | 0.126331000  | 0.499123000  |
| 8 | -2.762056000 | 0.204266000  | 0.946320000  |
| 6 | 0.126518000  | 1.705631000  | -0.499507000 |
| 8 | 0.205378000  | 2.761457000  | -0.946409000 |
| 6 | -0.126175000 | -1.705338000 | -0.499696000 |
| 6 | 1.705389000  | -0.126373000 | 0.499710000  |
| 8 | 2.761058000  | -0.204801000 | 0.947088000  |
| 8 | -0.203750000 | -2.761215000 | -0.946711000 |
